# Supplementary material for: How Moving Together Brings Us Together: When Coordinated Rhythmic Movement Affects Cooperation
Source: PubMed Central journal article supplement (PMC5177969; doi:10.3389/fpsyg.2016.01983), 2016-12-22

Appendix 1. The measure of self/other overlap.

Please choose the picture that best describes how you feel right now.

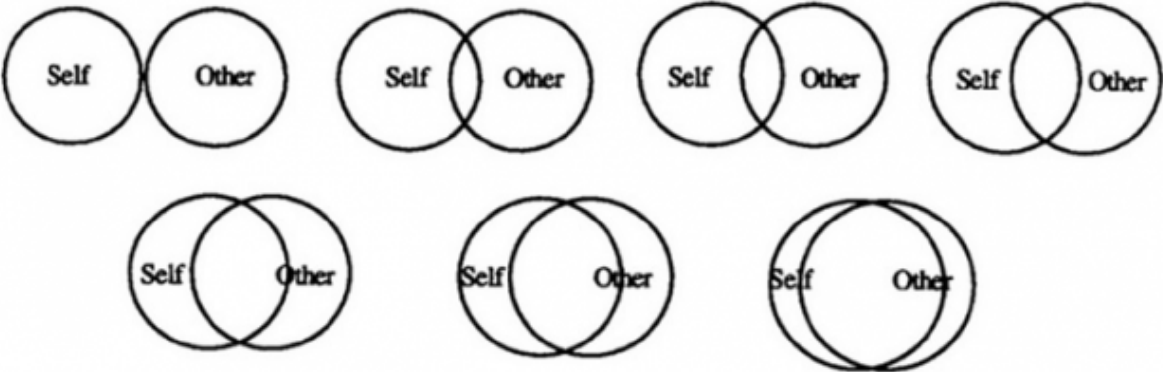

Supplement: DataSheet1.pdf [file DataSheet1.pdf]
