# Supplementary material for: How Moving Together Brings Us Together: When Coordinated Rhythmic Movement Affects Cooperation
Source: PubMed Central journal article supplement (PMC5177969; doi:10.3389/fpsyg.2016.01983), 2016-12-22
Supplement: DataSheet2.pdf [file DataSheet2.pdf]

Appendix 2. The cohesion scale.

Please record your responses to the following questions by placing a | at the appropriate place on the continuum. Please do so as carefully and neatly as possible.

Very unhappy                      ***How happy do you feel right now?***                      Very happy

{-----}

Not at all close                      ***How close do you feel to the other participants?***                      Very close

{-----}

Not at all similar                      ***How similar do you feel to the other participants?***                      Very similar

{-----}

Not at all.                      ***How connected do you feel to the other participant?***                      Very much so

{-----}

Not at all.                      ***How much do you trust the other participants?***                      Very much so

{-----}
